# Supplementary material for: Tracking of Melanoma Cell Plasticity by Transcriptional Reporters
Source: MDPI journal article supplement (doi:10.3390/ijms23031199), 2022-01-21
Supplement: s1 [file s1]

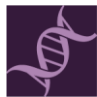

Supplementary file

# Tracking of melanoma cell plasticity by transcriptional reporters

Anna Vidal<sup>1</sup> and Torben Redmer<sup>2,\*</sup>

## Supplementary figures

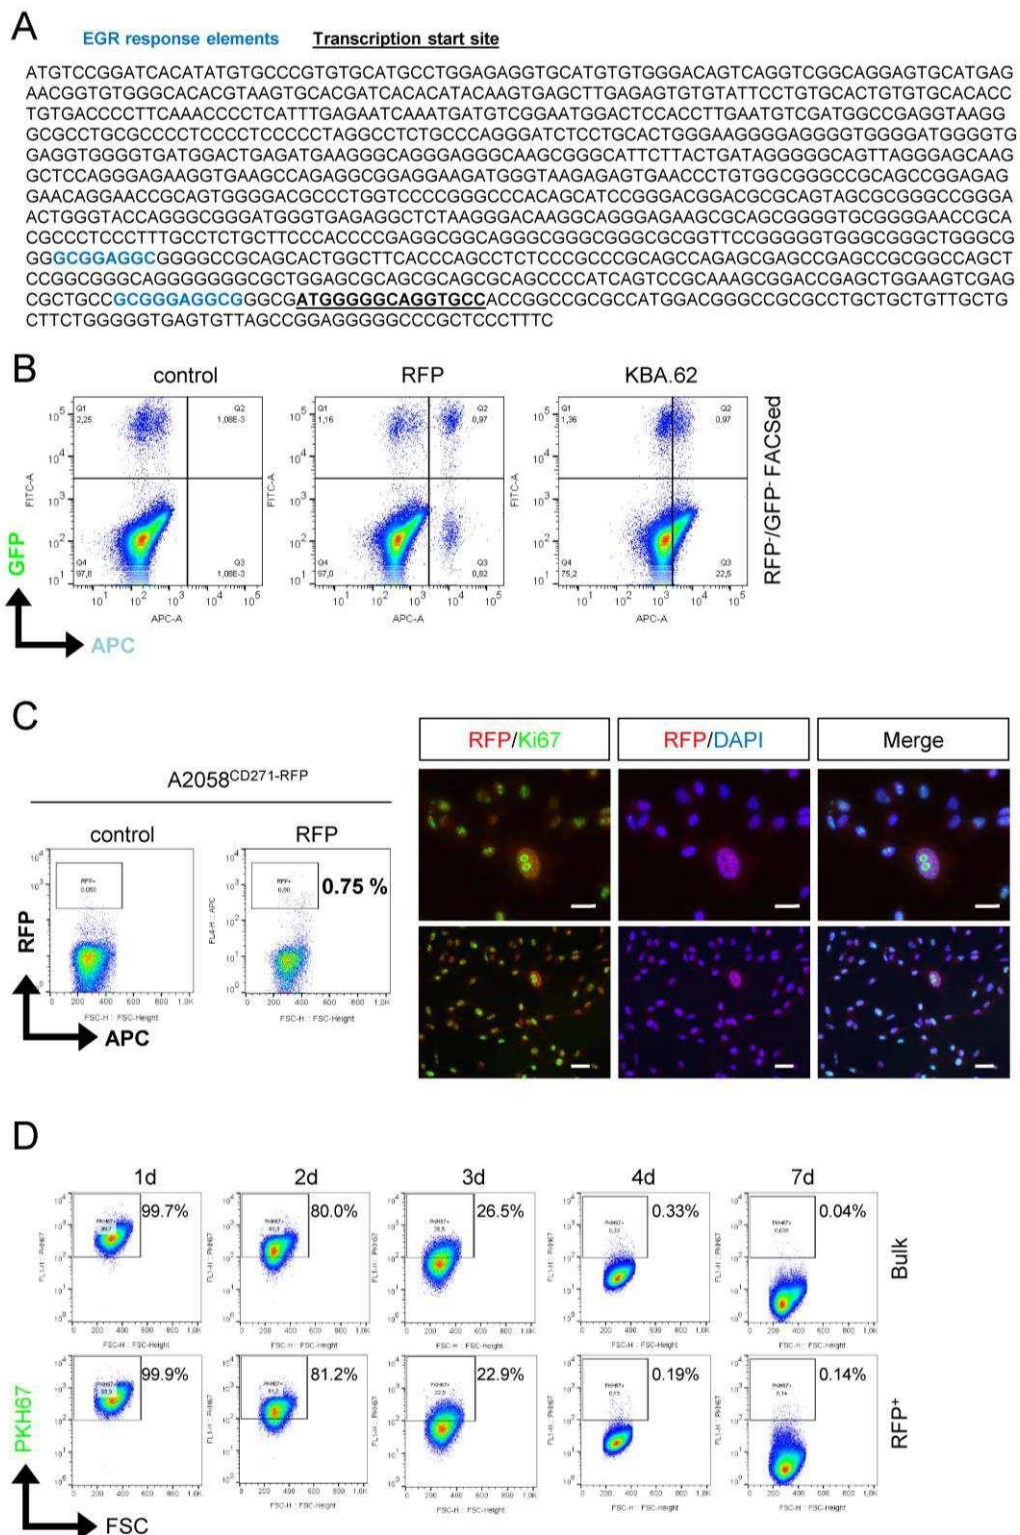

**Supplementary figure 1: Assessment of the label-retaining capacity of reporter cells.** A.) Sequence of a 1 kb fragment of the NGFR promoter that has been cloned into a customized RFP-reporter vector. Early growth response (EGR) elements are shown in blue. transcriptional start site is shown in bold and underlined. B.) Flow cytometric analysis of double-negative sorted dual-reporter A375 cells for levels of reporters (GFP, RFP) and KBA.62. 7d after FACS demonstrating cellular plasticity via emergence of NGFR+ from negative cells. An RFP-specific antibody was used for detection of RFP+ cells. C.) Flow cytometry and fluorescence microscopy-based detection of a minor RFP+ subset in A2058 cells. D.) Flow cytometric analysis of cellular subsets potentially retaining the lipophilic dye PKH67 in bulk and RFP+ cells after 7d. In (c); 10.000 and (b) and (d); 50.000 cells were recorded.

58

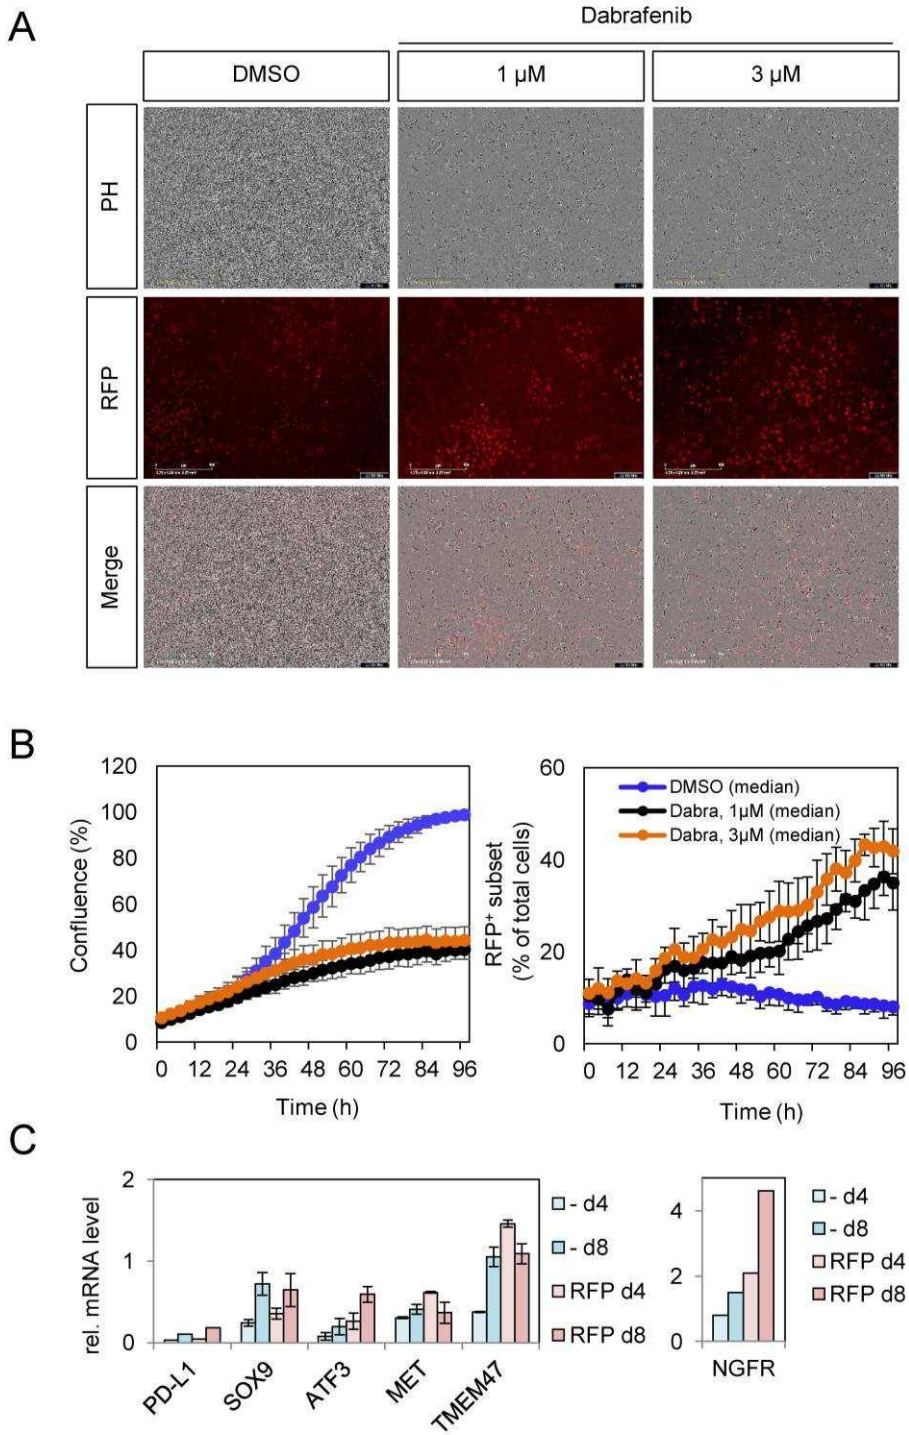

**Supplementary figure 2: Phenotype switching regulates putative mediators of stemness.** A.) Merged bright field and fluorescence images of A375 reporter cells indicate the increase in the number of RFP<sup>+</sup> cells in response to dabrafenib (1  $\mu$ M. 3  $\mu$ M. 96h) as tracked by live cell imaging. Bars indicate 400  $\mu$ m. B.) Dose-response of A375 cells towards dabrafenib (1. 3  $\mu$ M) as determined by changes in confluence (left panel). Live cell imaging-based quantification revealed a dose-dependent increase of RFP<sup>+</sup> cells over time (right panel) as compared to treatment control (DMSO). (right panel). C.) qPCR of RFP<sup>+</sup> (RFP) and RFP negative (-) sorted reporter cells. 4d and 8d after culturing for levels of PD-L1 (CD274). SOX9. ATF3. MET and TMEM47. values are depicted as mean $\pm$ sdv (left panel) and levels of NGFR (right panel).

## Supplementary tables

Table S1: Differentially regulated genes among RFP<sup>+</sup> and bulk cells (A375 reporter)

| ID              | baseMean | log2FoldChange | pvalue   | padj     | Gene symbol |
|-----------------|----------|----------------|----------|----------|-------------|
| ENSG00000162892 | 1277.82  | 4.277          | 1.69E-77 | 2.51E-73 | IL24        |
| ENSG00000196611 | 1085.14  | -3.830         | 2.15E-66 | 3.20E-62 | MMP1        |
| ENSG00000048052 | 1390.93  | 3.316          | 2.87E-55 | 4.27E-51 | HDAC9       |
| ENSG00000175445 | 528.36   | 4.072          | 7.05E-52 | 1.05E-47 | LPL         |
| ENSG00000154027 | 928.39   | 3.590          | 5.22E-51 | 7.77E-47 | AK5         |
| ENSG00000023839 | 2492.27  | -2.959         | 2.36E-50 | 3.52E-46 | ABCC2       |
| ENSG00000265972 | 8157.13  | 3.110          | 3.10E-50 | 4.61E-46 | TXNIP       |
| ENSG00000113532 | 1497.62  | -3.276         | 3.20E-48 | 4.76E-44 | ST8SIA4     |
| ENSG00000137868 | 1199.12  | -3.132         | 1.93E-46 | 2.86E-42 | STRA6       |
| ENSG00000171051 | 338.83   | -5.768         | 2.14E-45 | 3.18E-41 | FPR1        |
| ENSG00000156687 | 1701.10  | -3.002         | 1.28E-43 | 1.90E-39 | UNC5D       |
| ENSG00000128340 | 474.44   | -4.278         | 7.08E-43 | 1.05E-38 | RAC2        |
| ENSG00000149294 | 348.97   | 3.945          | 4.42E-41 | 6.57E-37 | NCAM1       |
| ENSG00000265107 | 278.76   | -5.725         | 1.50E-40 | 2.24E-36 | GJA5        |
| ENSG00000151789 | 612.33   | -3.053         | 2.43E-38 | 3.61E-34 | ZNF385D     |
| ENSG00000049192 | 3877.64  | 2.550          | 3.99E-38 | 5.94E-34 | ADAMTS6     |
| ENSG00000213658 | 238.27   | -4.162         | 2.85E-37 | 4.24E-33 | LAT         |
| ENSG00000196549 | 3210.60  | 2.571          | 7.20E-37 | 1.07E-32 | MME         |
| ENSG00000183688 | 633.09   | 3.025          | 1.73E-36 | 2.57E-32 | RFLNB       |
| ENSG00000117069 | 831.96   | 2.978          | 6.87E-36 | 1.02E-31 | ST6GALNAC5  |
| ENSG00000145681 | 4797.28  | 3.010          | 3.40E-34 | 5.06E-30 | HAPLN1      |
| ENSG00000120949 | 336.66   | -3.380         | 6.25E-33 | 9.30E-29 | TNFRSF8     |
| ENSG00000106034 | 990.03   | 3.359          | 7.95E-33 | 1.18E-28 | CPED1       |
| ENSG00000124225 | 1677.82  | -2.464         | 1.41E-32 | 2.10E-28 | PMEP1A1     |
| ENSG00000104419 | 6776.00  | 2.664          | 1.98E-32 | 2.95E-28 | NDRG1       |
| ENSG00000223638 | 399.47   | 3.216          | 2.14E-32 | 3.18E-28 | RFPL4A      |

|                 |           |        |          |          |          |
|-----------------|-----------|--------|----------|----------|----------|
| ENSG00000227234 | 11466.30  | 2.698  | 3.10E-32 | 4.61E-28 | SPANXB1  |
| ENSG00000147027 | 919.34    | 2.792  | 3.88E-32 | 5.76E-28 | TMEM47   |
| ENSG00000120594 | 1082.55   | -2.458 | 2.72E-31 | 4.04E-27 | PLXDC2   |
| ENSG00000071242 | 361.14    | 3.116  | 6.25E-31 | 9.29E-27 | RPS6KA2  |
| ENSG00000148677 | 7803.00   | 2.185  | 8.69E-31 | 1.29E-26 | ANKRD1   |
| ENSG00000170989 | 805.34    | 2.629  | 2.88E-30 | 4.29E-26 | S1PR1    |
| ENSG00000184588 | 497.63    | -2.875 | 9.03E-30 | 1.34E-25 | PDE4B    |
| ENSG00000164251 | 2402.96   | -2.349 | 1.09E-29 | 1.63E-25 | F2RL1    |
| ENSG00000128965 | 1282.11   | 2.372  | 1.26E-29 | 1.87E-25 | CHAC1    |
| ENSG00000148513 | 807.25    | 2.433  | 1.20E-27 | 1.79E-23 | ANKRD30A |
| ENSG00000138829 | 219.93    | 4.156  | 3.43E-27 | 5.10E-23 | FBN2     |
| ENSG00000115414 | 13272.86  | -2.290 | 6.02E-27 | 8.95E-23 | FN1      |
| ENSG00000118971 | 192.38    | 6.589  | 7.28E-27 | 1.08E-22 | CCND2    |
| ENSG00000165507 | 276.72    | 3.052  | 3.85E-26 | 5.73E-22 | DEPP1    |
| ENSG00000100311 | 151.59    | 4.506  | 4.61E-26 | 6.86E-22 | PDGFB    |
| ENSG00000116761 | 816.74    | 2.371  | 5.82E-26 | 8.65E-22 | CTH      |
| ENSG00000204389 | 1583.61   | -2.654 | 9.84E-26 | 1.46E-21 | HSPA1A   |
| ENSG00000134363 | 6678.73   | 2.561  | 1.10E-25 | 1.64E-21 | FST      |
| ENSG00000151376 | 337.39    | 2.896  | 1.22E-25 | 1.82E-21 | ME3      |
| ENSG00000162772 | 1058.53   | 2.238  | 1.23E-25 | 1.82E-21 | ATF3     |
| ENSG00000138759 | 532.66    | 2.764  | 1.63E-25 | 2.42E-21 | FRAS1    |
| ENSG00000164161 | 993.32    | 2.386  | 2.69E-25 | 4.00E-21 | HHIP     |
| ENSG00000184564 | 249.33    | -3.086 | 7.33E-25 | 1.09E-20 | SLITRK6  |
| ENSG00000022556 | 1433.48   | -2.212 | 1.31E-24 | 1.94E-20 | NLRP2    |
| ENSG00000137767 | 572.33    | 2.373  | 2.31E-24 | 3.44E-20 | SQOR     |
| ENSG00000155265 | 351.31    | -2.688 | 2.89E-24 | 4.30E-20 | GOLGA7B  |
| ENSG00000196562 | 3140.58   | -2.213 | 3.80E-24 | 5.66E-20 | SULF2    |
| ENSG00000229292 | 234.28    | 3.372  | 3.87E-24 | 5.75E-20 | RFPL4AL1 |
| ENSG00000122641 | 8933.85   | 1.929  | 4.45E-24 | 6.62E-20 | INHBA    |
| ENSG00000100867 | 192.50    | -3.059 | 1.77E-22 | 2.64E-18 | DHRS2    |
| ENSG00000117318 | 2965.95   | -2.180 | 2.40E-22 | 3.57E-18 | ID3      |
| ENSG00000162511 | 108.15    | -5.939 | 2.92E-22 | 4.35E-18 | LAPTM5   |
| ENSG00000213949 | 6198.86   | -2.686 | 3.90E-22 | 5.79E-18 | ITGA1    |
| ENSG00000146674 | 2395.98   | 2.019  | 6.01E-19 | 8.94E-15 | IGFBP3   |
| ENSG00000170909 | 258.56    | 2.729  | 5.44E-21 | 8.10E-17 | OSCAR    |
| ENSG00000140563 | 1224.32   | 2.018  | 6.22E-21 | 9.25E-17 | MCTP2    |
| ENSG00000204388 | 1451.76   | -2.511 | 7.86E-21 | 1.17E-16 | HSPA1B   |
| ENSG00000109971 | 148411.09 | -1.847 | 9.39E-21 | 1.40E-16 | HSPA8    |
| ENSG00000198573 | 2036.31   | 1.858  | 1.47E-20 | 2.19E-16 | SPANXC   |
| ENSG00000003436 | 2659.00   | 1.987  | 3.19E-21 | 4.75E-17 | TFPI     |
| ENSG00000183287 | 5362.01   | 2.108  | 2.48E-20 | 3.69E-16 | CCBE1    |

|                 |         |        |          |          |          |
|-----------------|---------|--------|----------|----------|----------|
| ENSG00000125968 | 4248.97 | -2.142 | 2.57E-20 | 3.83E-16 | ID1      |
| ENSG00000159200 | 3180.53 | 1.780  | 2.90E-20 | 4.32E-16 | RCAN1    |
| ENSG00000166033 | 1510.95 | -2.959 | 3.74E-20 | 5.57E-16 | HTRA1    |
| ENSG00000142871 | 7489.34 | 1.801  | 4.63E-20 | 6.89E-16 | CYR61    |
| ENSG00000104327 | 110.31  | 5.402  | 7.35E-20 | 1.09E-15 | CALB1    |
| ENSG00000165118 | 293.02  | 2.482  | 1.18E-19 | 1.76E-15 | C9orf64  |
| ENSG00000198732 | 1830.08 | 1.908  | 1.76E-19 | 2.62E-15 | SMOC1    |
| ENSG00000087494 | 594.12  | -2.098 | 1.87E-19 | 2.78E-15 | PTHLH    |
| ENSG00000151617 | 313.16  | -2.523 | 2.46E-19 | 3.66E-15 | EDNRA    |
| ENSG00000149968 | 242.98  | -3.462 | 2.62E-19 | 3.90E-15 | MMP3     |
| ENSG00000132274 | 298.21  | -2.658 | 2.71E-19 | 4.03E-15 | TRIM22   |
| ENSG00000025039 | 787.44  | 1.979  | 2.91E-19 | 4.33E-15 | RRAGD    |
| ENSG00000101210 | 3510.02 | 1.909  | 1.84E-20 | 2.74E-16 | EEF1A2   |
| ENSG00000120217 | 1173.85 | 1.857  | 7.15E-19 | 1.06E-14 | CD274    |
| ENSG00000104177 | 1786.13 | 1.722  | 6.45E-15 | 9.60E-11 | MYEF2    |
| ENSG00000115902 | 1744.44 | 2.022  | 8.88E-19 | 1.32E-14 | SLC1A4   |
| ENSG00000174951 | 243.63  | 2.556  | 1.15E-18 | 1.72E-14 | FUT1     |
| ENSG00000137959 | 393.56  | -2.563 | 1.67E-18 | 2.49E-14 | IFI44L   |
| ENSG00000074410 | 155.08  | -4.048 | 2.00E-18 | 2.97E-14 | CA12     |
| ENSG00000243709 | 115.40  | -4.796 | 2.51E-18 | 3.73E-14 | LEFTY1   |
| ENSG00000074416 | 3067.96 | 2.285  | 2.73E-18 | 4.06E-14 | MGLL     |
| ENSG00000107159 | 786.94  | 2.381  | 3.45E-18 | 5.14E-14 | CA9      |
| ENSG00000114315 | 410.84  | -2.099 | 6.29E-18 | 9.36E-14 | HES1     |
| ENSG00000197928 | 176.73  | 2.867  | 7.41E-18 | 1.10E-13 | ZNF677   |
| ENSG00000163347 | 90.67   | 4.827  | 7.63E-18 | 1.14E-13 | CLDN1    |
| ENSG00000174600 | 87.71   | -5.051 | 9.03E-18 | 1.34E-13 | CMKLR1   |
| ENSG00000170579 | 134.56  | 3.194  | 1.06E-17 | 1.57E-13 | DLGAP1   |
| ENSG00000144821 | 753.43  | -1.914 | 1.13E-17 | 1.68E-13 | MYH15    |
| ENSG00000075340 | 2507.09 | 1.778  | 1.69E-17 | 2.51E-13 | ADD2     |
| ENSG00000148344 | 1037.13 | -2.309 | 1.91E-17 | 2.84E-13 | PTGES    |
| ENSG00000116183 | 298.83  | 2.306  | 2.02E-17 | 3.01E-13 | PAPPA2   |
| ENSG00000130766 | 1869.56 | 1.777  | 2.64E-17 | 3.93E-13 | SESN2    |
| ENSG00000166342 | 1225.85 | 1.804  | 2.80E-17 | 4.17E-13 | NETO1    |
| ENSG00000106123 | 91.64   | -3.944 | 3.48E-17 | 5.17E-13 | EPHB6    |
| ENSG00000214944 | 3333.85 | 1.347  | 1.30E-11 | 1.93E-07 | ARHGEF28 |
| ENSG00000077942 | 111.16  | 3.583  | 4.45E-17 | 6.61E-13 | FBLN1    |
| ENSG00000143195 | 352.99  | -2.160 | 6.04E-17 | 8.99E-13 | ILDR2    |
| ENSG00000104368 | 7752.59 | 1.777  | 6.18E-17 | 9.19E-13 | PLAT     |
| ENSG00000112379 | 797.32  | 2.176  | 8.46E-17 | 1.26E-12 | ARFGEF3  |
| ENSG00000198074 | 137.81  | -3.105 | 1.00E-16 | 1.49E-12 | AKR1B10  |
| ENSG00000173918 | 216.50  | -2.428 | 1.33E-16 | 1.98E-12 | C1QTNF1  |

|                 |          |        |          |          |         |
|-----------------|----------|--------|----------|----------|---------|
| ENSG00000184185 | 117.78   | -3.320 | 1.43E-16 | 2.13E-12 | KCNJ12  |
| ENSG00000185053 | 727.26   | 1.824  | 1.63E-16 | 2.42E-12 | SGCZ    |
| ENSG00000135549 | 1384.19  | -1.808 | 2.62E-16 | 3.90E-12 | PKIB    |
| ENSG00000183421 | 591.80   | -1.976 | 3.03E-16 | 4.50E-12 | RIPK4   |
| ENSG00000182054 | 1250.47  | 1.674  | 3.07E-16 | 4.57E-12 | IDH2    |
| ENSG00000110723 | 120.69   | 3.194  | 3.38E-16 | 5.02E-12 | EXPH5   |
| ENSG00000167191 | 400.83   | 2.042  | 4.04E-16 | 6.01E-12 | GPRC5B  |
| ENSG00000148154 | 13360.76 | 1.521  | 4.23E-16 | 6.29E-12 | UGCG    |
| ENSG00000120694 | 17733.51 | -1.535 | 4.68E-16 | 6.97E-12 | HSPH1   |
| ENSG00000183128 | 93.97    | -3.543 | 5.20E-16 | 7.73E-12 | CALHM3  |
| ENSG00000116132 | 1221.99  | -1.915 | 5.55E-16 | 8.26E-12 | PRRX1   |
| ENSG00000250312 | 152.95   | 2.742  | 7.12E-16 | 1.06E-11 | ZNF718  |
| ENSG00000182111 | 377.50   | 2.200  | 7.58E-16 | 1.13E-11 | ZNF716  |
| ENSG00000131016 | 14208.65 | 2.089  | 9.17E-16 | 1.36E-11 | AKAP12  |
| ENSG00000105472 | 285.10   | 2.174  | 1.37E-15 | 2.04E-11 | CLEC11A |
| ENSG00000109743 | 203.41   | 2.439  | 1.76E-15 | 2.62E-11 | BST1    |
| ENSG00000106078 | 126.59   | 3.025  | 1.77E-15 | 2.64E-11 | COBL    |
| ENSG00000125810 | 100.04   | -3.378 | 1.89E-15 | 2.81E-11 | CD93    |
| ENSG00000148053 | 123.58   | -3.264 | 2.41E-15 | 3.58E-11 | NTRK2   |
| ENSG00000143322 | 13084.84 | 1.775  | 2.41E-15 | 3.58E-11 | ABL2    |
| ENSG00000184524 | 155.21   | -2.673 | 3.31E-15 | 4.93E-11 | CEND1   |
| ENSG00000165959 | 421.16   | 1.921  | 3.53E-15 | 5.25E-11 | CLMN    |
| ENSG00000165509 | 103.92   | 3.326  | 3.83E-15 | 5.70E-11 | MAGEC3  |
| ENSG00000142949 | 41041.94 | 1.838  | 5.97E-15 | 8.87E-11 | PTPRF   |
| ENSG00000178752 | 187.15   | 2.420  | 6.00E-15 | 8.92E-11 | ERFE    |
| ENSG00000078018 | 302.81   | -3.063 | 6.19E-15 | 9.21E-11 | MAP2    |
| ENSG00000159216 | 1289.49  | 1.259  | 1.97E-06 | 2.93E-02 | RUNX1   |
| ENSG00000115423 | 102.18   | 3.344  | 8.15E-15 | 1.21E-10 | DNAH6   |
| ENSG00000162614 | 513.17   | 1.869  | 8.75E-15 | 1.30E-10 | NEXN    |
| ENSG00000142279 | 223.93   | 2.368  | 8.85E-15 | 1.32E-10 | WTIP    |
| ENSG00000148848 | 269.66   | -2.190 | 1.18E-14 | 1.76E-10 | ADAM12  |
| ENSG00000197444 | 170.59   | 2.484  | 1.39E-14 | 2.06E-10 | OGDHL   |
| ENSG00000169908 | 15155.74 | 1.448  | 1.69E-14 | 2.51E-10 | TM4SF1  |
| ENSG00000128606 | 841.58   | -2.054 | 1.70E-14 | 2.52E-10 | LRRC17  |
| ENSG00000109511 | 401.90   | -1.947 | 1.73E-14 | 2.57E-10 | ANXA10  |
| ENSG00000176658 | 293.19   | 2.056  | 2.03E-14 | 3.02E-10 | MYO1D   |
| ENSG00000086061 | 13689.08 | -1.425 | 2.05E-14 | 3.04E-10 | DNAJA1  |
| ENSG00000141526 | 895.84   | -1.774 | 2.74E-14 | 4.07E-10 | SLC16A3 |
| ENSG00000165449 | 198.15   | 2.375  | 3.03E-14 | 4.50E-10 | SLC16A9 |
| ENSG00000105509 | 80.77    | -6.912 | 3.16E-14 | 4.70E-10 | HAS1    |
| ENSG00000115525 | 704.32   | -1.711 | 3.27E-14 | 4.87E-10 | ST3GAL5 |



|                 |          |        |          |          |          |
|-----------------|----------|--------|----------|----------|----------|
| ENSG00000071575 | 1349.34  | -1.663 | 3.34E-14 | 4.97E-10 | TRIB2    |
| ENSG00000128342 | 3784.57  | 1.453  | 3.36E-14 | 5.00E-10 | LIF      |
| ENSG00000255346 | 227.81   | -2.294 | 4.11E-14 | 6.12E-10 | NOX5     |
| ENSG00000124785 | 355.16   | 2.045  | 4.29E-14 | 6.38E-10 | NRN1     |
| ENSG00000169439 | 835.24   | -2.038 | 4.69E-14 | 6.98E-10 | SDC2     |
| ENSG00000115461 | 65.93    | -3.903 | 4.72E-14 | 7.02E-10 | IGFBP5   |
| ENSG00000157551 | 91.44    | -3.502 | 5.49E-14 | 8.17E-10 | KCNJ15   |
| ENSG00000196502 | 87.68    | -3.519 | 5.70E-14 | 8.48E-10 | SULT1A1  |
| ENSG00000081138 | 251.57   | -2.418 | 6.09E-14 | 9.06E-10 | CDH7     |
| ENSG00000047617 | 135.23   | 3.016  | 6.67E-14 | 9.92E-10 | ANO2     |
| ENSG00000138166 | 3630.58  | 1.444  | 6.71E-14 | 9.98E-10 | DUSP5    |
| ENSG00000130303 | 99.35    | -3.347 | 8.55E-14 | 1.27E-09 | BST2     |
| ENSG00000182752 | 393.54   | -1.919 | 8.87E-14 | 1.32E-09 | PAPPA    |
| ENSG00000175197 | 1841.59  | 1.797  | 1.00E-13 | 1.49E-09 | DDIT3    |
| ENSG00000109321 | 2520.09  | -1.879 | 1.02E-13 | 1.51E-09 | AREG     |
| ENSG00000185274 | 81.53    | 3.529  | 1.03E-13 | 1.54E-09 | GALNT17  |
| ENSG00000188015 | 826.42   | -1.633 | 1.36E-13 | 2.03E-09 | S100A3   |
| ENSG00000011201 | 183.40   | 2.304  | 1.43E-13 | 2.13E-09 | ANOS1    |
| ENSG00000164099 | 835.31   | 1.592  | 1.47E-13 | 2.19E-09 | PRSS12   |
| ENSG00000178031 | 3630.67  | 1.766  | 1.50E-13 | 2.23E-09 | ADAMTSL1 |
| ENSG00000080031 | 347.04   | 1.892  | 1.57E-13 | 2.33E-09 | PTPRH    |
| ENSG00000162631 | 528.49   | 1.785  | 1.67E-13 | 2.49E-09 | NTNG1    |
| ENSG00000134532 | 1133.83  | -1.515 | 1.81E-13 | 2.70E-09 | SOX5     |
| ENSG00000134762 | 436.14   | 2.020  | 1.89E-13 | 2.81E-09 | DSC3     |
| ENSG00000112773 | 688.85   | -1.731 | 1.99E-13 | 2.96E-09 | TENT5A   |
| ENSG00000112851 | 18465.08 | 1.370  | 2.32E-13 | 3.44E-09 | ERBIN    |
| ENSG00000067445 | 104.52   | -2.896 | 2.39E-13 | 3.55E-09 | TRO      |
| ENSG00000185905 | 175.41   | -2.315 | 2.44E-13 | 3.64E-09 | C16orf54 |
| ENSG00000173597 | 128.22   | -2.549 | 2.53E-13 | 3.76E-09 | SULT1B1  |
| ENSG00000054654 | 756.73   | 1.973  | 2.61E-13 | 3.88E-09 | SYNE2    |
| ENSG00000168874 | 138.55   | -2.465 | 2.62E-13 | 3.90E-09 | ATOH8    |
| ENSG00000162676 | 123.81   | 2.722  | 2.84E-13 | 4.23E-09 | GFI1     |
| ENSG00000196110 | 746.69   | 1.592  | 3.01E-13 | 4.48E-09 | ZNF699   |
| ENSG00000169126 | 641.04   | 1.636  | 3.03E-13 | 4.51E-09 | ARMC4    |
| ENSG00000105376 | 762.77   | 1.635  | 3.11E-13 | 4.63E-09 | ICAM5    |
| ENSG00000163694 | 259.66   | -2.014 | 3.48E-13 | 5.17E-09 | RBM47    |
| ENSG00000204442 | 886.35   | -1.672 | 4.78E-13 | 7.11E-09 | FAM155A  |
| ENSG00000174343 | 83.69    | -3.730 | 4.86E-13 | 7.23E-09 | CHRNA9   |
| ENSG00000092969 | 339.53   | -1.935 | 4.93E-13 | 7.34E-09 | TGFB2    |
| ENSG00000140044 | 490.95   | 1.721  | 5.25E-13 | 7.81E-09 | JDP2     |
| ENSG00000152377 | 1317.01  | -1.506 | 5.53E-13 | 8.23E-09 | SPOCK1   |

|                 |          |        |          |          |          |
|-----------------|----------|--------|----------|----------|----------|
| ENSG00000101188 | 209.76   | -2.597 | 5.62E-13 | 8.35E-09 | NTSR1    |
| ENSG00000176595 | 93.13    | 3.169  | 5.68E-13 | 8.46E-09 | KBTBD11  |
| ENSG00000163412 | 329.56   | 1.872  | 5.97E-13 | 8.88E-09 | EIF4E3   |
| ENSG00000100146 | 645.64   | -1.879 | 6.01E-13 | 8.94E-09 | SOX10    |
| ENSG00000170689 | 495.18   | 1.805  | 6.68E-13 | 9.94E-09 | HOXB9    |
| ENSG00000259207 | 1484.04  | -1.536 | 6.78E-13 | 1.01E-08 | ITGB3    |
| ENSG00000064042 | 6671.63  | 1.355  | 7.37E-13 | 1.10E-08 | LIMCH1   |
| ENSG00000174136 | 2448.87  | 1.470  | 7.45E-13 | 1.11E-08 | RGMB     |
| ENSG00000138131 | 4964.13  | 1.708  | 8.06E-13 | 1.20E-08 | LOXL4    |
| ENSG00000151892 | 72.16    | 3.657  | 8.53E-13 | 1.27E-08 | GFRA1    |
| ENSG00000033327 | 468.43   | 2.042  | 1.01E-12 | 1.50E-08 | GAB2     |
| ENSG00000121413 | 643.60   | 1.597  | 1.14E-12 | 1.69E-08 | ZSCAN18  |
| ENSG00000184489 | 63.11    | 4.132  | 1.16E-12 | 1.72E-08 | PTP4A3   |
| ENSG00000163884 | 102.81   | 3.172  | 1.28E-12 | 1.91E-08 | KLF15    |
| ENSG00000196754 | 1947.40  | -1.503 | 1.33E-12 | 1.99E-08 | S100A2   |
| ENSG00000023608 | 10356.72 | 1.714  | 1.35E-12 | 2.00E-08 | SNAPC1   |
| ENSG00000119711 | 614.59   | 1.599  | 1.50E-12 | 2.23E-08 | ALDH6A1  |
| ENSG00000087074 | 4324.70  | 1.552  | 1.76E-12 | 2.61E-08 | PPP1R15A |
| ENSG00000136010 | 2544.52  | 1.641  | 1.90E-12 | 2.83E-08 | ALDH1L2  |
| ENSG00000137193 | 1272.12  | 1.681  | 1.94E-12 | 2.89E-08 | PIM1     |
| ENSG00000066056 | 785.83   | 1.742  | 1.99E-12 | 2.95E-08 | TIE1     |
| ENSG00000183691 | 714.89   | 2.108  | 1.99E-12 | 2.96E-08 | NOG      |
| ENSG00000107099 | 55.31    | -4.731 | 2.09E-12 | 3.12E-08 | DOCK8    |
| ENSG00000163092 | 75.58    | 3.360  | 2.13E-12 | 3.17E-08 | XIRP2    |
| ENSG00000125266 | 1177.48  | -1.526 | 2.63E-12 | 3.92E-08 | EFNB2    |
| ENSG00000164983 | 1359.16  | 1.444  | 2.68E-12 | 3.98E-08 | TMEM65   |
| ENSG00000119950 | 1698.73  | 1.396  | 3.18E-12 | 4.74E-08 | MXI1     |
| ENSG00000198914 | 98.60    | 2.780  | 4.59E-12 | 6.82E-08 | POU3F3   |
| ENSG00000139626 | 222.58   | -1.962 | 4.65E-12 | 6.92E-08 | ITGB7    |
| ENSG00000113303 | 98.64    | 2.793  | 4.91E-12 | 7.30E-08 | BTNL8    |
| ENSG00000196876 | 376.45   | 1.737  | 5.06E-12 | 7.53E-08 | SCN8A    |
| ENSG00000044524 | 339.32   | 1.771  | 5.19E-12 | 7.71E-08 | EPHA3    |
| ENSG00000111879 | 302.80   | 1.900  | 5.66E-12 | 8.42E-08 | FAM184A  |
| ENSG00000163762 | 559.55   | 1.599  | 5.89E-12 | 8.76E-08 | TM4SF18  |
| ENSG00000163032 | 257.63   | -2.031 | 7.58E-12 | 1.13E-07 | VSNL1    |
| ENSG00000176293 | 356.65   | 1.761  | 8.24E-12 | 1.23E-07 | ZNF135   |
| ENSG00000160321 | 201.55   | 2.586  | 9.31E-12 | 1.39E-07 | ZNF208   |
| ENSG00000116741 | 762.68   | -1.887 | 1.07E-11 | 1.59E-07 | RGS2     |
| ENSG00000151062 | 104.12   | 2.873  | 1.08E-11 | 1.61E-07 | CACNA2D4 |
| ENSG00000100889 | 2335.89  | 1.409  | 1.08E-11 | 1.61E-07 | PCK2     |
| ENSG00000134755 | 293.48   | 1.826  | 1.14E-11 | 1.70E-07 | DSC2     |



|                 |          |        |          |          |          |
|-----------------|----------|--------|----------|----------|----------|
| ENSG00000008256 | 2737.71  | 1.328  | 1.20E-11 | 1.78E-07 | CYTH3    |
| ENSG00000188488 | 217.48   | -2.142 | 1.28E-11 | 1.90E-07 | SERPINA5 |
| ENSG00000134954 | 6548.66  | 1.171  | 1.11E-07 | 1.66E-03 | ETS1     |
| ENSG00000123358 | 546.61   | 1.598  | 1.32E-11 | 1.97E-07 | NR4A1    |
| ENSG00000113504 | 559.55   | 1.667  | 1.35E-11 | 2.01E-07 | SLC12A7  |
| ENSG00000164683 | 179.76   | -2.574 | 1.63E-11 | 2.42E-07 | HEY1     |
| ENSG00000111674 | 3017.24  | 1.372  | 1.63E-11 | 2.42E-07 | ENO2     |
| ENSG00000133687 | 230.02   | -1.962 | 1.65E-11 | 2.45E-07 | TMTC1    |
| ENSG00000150054 | 506.29   | 1.740  | 1.72E-11 | 2.55E-07 | MPP7     |
| ENSG00000142619 | 227.68   | -1.953 | 1.86E-11 | 2.76E-07 | PADI3    |
| ENSG00000099860 | 967.27   | 1.413  | 1.90E-11 | 2.83E-07 | GADD45B  |
| ENSG00000183873 | 67.96    | 3.447  | 1.91E-11 | 2.84E-07 | SCN5A    |
| ENSG00000009694 | 152.02   | 2.231  | 2.18E-11 | 3.24E-07 | TENM1    |
| ENSG00000070540 | 1131.95  | 1.611  | 2.29E-11 | 3.41E-07 | WIPI1    |
| ENSG00000166833 | 324.95   | 2.259  | 2.64E-11 | 3.93E-07 | NAV2     |
| ENSG00000205426 | 26980.46 | 1.316  | 2.73E-11 | 4.07E-07 | KRT81    |
| ENSG00000179242 | 516.19   | 2.196  | 3.01E-11 | 4.48E-07 | CDH4     |
| ENSG00000168209 | 11762.58 | 1.801  | 3.85E-11 | 5.73E-07 | DDIT4    |
| ENSG00000117152 | 1126.46  | -1.389 | 4.29E-11 | 6.39E-07 | RGS4     |
| ENSG00000198797 | 54.62    | 3.947  | 4.30E-11 | 6.40E-07 | BRINP2   |
| ENSG00000125798 | 110.90   | 3.204  | 4.49E-11 | 6.68E-07 | FOXA2    |
| ENSG00000163531 | 372.23   | 1.752  | 4.60E-11 | 6.84E-07 | NFASC    |
| ENSG00000134986 | 1066.59  | -1.881 | 4.73E-11 | 7.04E-07 | NREP     |
| ENSG00000149571 | 280.55   | 1.780  | 4.74E-11 | 7.05E-07 | KIRREL3  |
| ENSG00000172020 | 161.77   | -2.466 | 4.89E-11 | 7.27E-07 | GAP43    |
| ENSG00000186469 | 483.48   | -1.770 | 5.33E-11 | 7.93E-07 | GNG2     |
| ENSG00000136237 | 768.00   | 1.426  | 5.35E-11 | 7.95E-07 | RAPGEF5  |
| ENSG00000187244 | 530.91   | 1.622  | 6.22E-11 | 9.26E-07 | BCAM     |
| ENSG00000140481 | 90.53    | -2.853 | 6.50E-11 | 9.67E-07 | CCDC33   |
| ENSG00000164197 | 255.67   | 1.795  | 7.61E-11 | 1.13E-06 | RNF180   |
| ENSG00000082397 | 2303.82  | 1.333  | 7.70E-11 | 1.15E-06 | EPB41L3  |
| ENSG00000168461 | 1054.08  | -1.370 | 8.13E-11 | 1.21E-06 | RAB31    |
| ENSG00000188467 | 265.96   | 1.895  | 9.21E-11 | 1.37E-06 | SLC24A5  |
| ENSG00000152137 | 1152.70  | -1.349 | 1.09E-10 | 1.63E-06 | HSPB8    |
| ENSG00000159339 | 71.71    | -7.373 | 1.13E-10 | 1.68E-06 | PADI4    |
| ENSG00000126860 | 388.03   | 1.653  | 1.19E-10 | 1.77E-06 | EVI2A    |
| ENSG00000139269 | 129.74   | 2.953  | 1.20E-10 | 1.78E-06 | INHBE    |
| ENSG00000166106 | 413.68   | -1.678 | 1.29E-10 | 1.92E-06 | ADAMTS15 |
| ENSG00000266338 | 2207.75  | 1.340  | 1.29E-10 | 1.93E-06 | NBPF15   |
| ENSG00000174405 | 1679.30  | -1.503 | 1.47E-10 | 2.19E-06 | LIG4     |
| ENSG00000110665 | 41.30    | -4.534 | 1.64E-10 | 2.44E-06 | C11orf21 |

|                 |          |        |          |          |         |
|-----------------|----------|--------|----------|----------|---------|
| ENSG00000100784 | 524.74   | 1.517  | 1.76E-10 | 2.62E-06 | RPS6KA5 |
| ENSG00000153993 | 1558.08  | 1.335  | 1.79E-10 | 2.66E-06 | SEMA3D  |
| ENSG00000112769 | 10806.00 | 1.406  | 1.81E-10 | 2.70E-06 | LAMA4   |
| ENSG00000112972 | 5762.65  | 1.586  | 1.97E-10 | 2.94E-06 | HMGCS1  |
| ENSG00000137745 | 48.08    | -4.049 | 2.10E-10 | 3.12E-06 | MMP13   |
| ENSG00000135362 | 192.88   | -1.883 | 2.40E-10 | 3.57E-06 | PRR5L   |
| ENSG00000006042 | 154.10   | 2.092  | 2.57E-10 | 3.83E-06 | TMEM98  |
| ENSG00000117461 | 563.54   | -1.431 | 2.58E-10 | 3.83E-06 | PIK3R3  |
| ENSG00000130635 | 896.43   | -1.945 | 2.85E-10 | 4.25E-06 | COL5A1  |
| ENSG00000166402 | 338.23   | 1.647  | 2.86E-10 | 4.25E-06 | TUB     |
| ENSG00000067798 | 1968.96  | 1.248  | 3.22E-10 | 4.80E-06 | NAV3    |
| ENSG00000164283 | 3324.95  | 1.365  | 3.27E-10 | 4.86E-06 | ESM1    |
| ENSG00000143847 | 248.34   | 1.756  | 3.43E-10 | 5.11E-06 | PPFIA4  |
| ENSG00000125657 | 1049.26  | -1.320 | 4.00E-10 | 5.95E-06 | TNFSF9  |
| ENSG00000106484 | 185.37   | -2.164 | 4.05E-10 | 6.03E-06 | MEST    |
| ENSG00000129422 | 755.08   | 1.399  | 4.15E-10 | 6.18E-06 | MTUS1   |
| ENSG00000108821 | 253.29   | 2.328  | 4.20E-10 | 6.24E-06 | COL1A1  |
| ENSG00000079263 | 343.32   | -1.578 | 4.50E-10 | 6.70E-06 | SP140   |
| ENSG00000138623 | 8525.02  | 1.213  | 4.64E-10 | 6.90E-06 | SEMA7A  |
| ENSG00000075651 | 896.96   | 1.319  | 4.71E-10 | 7.01E-06 | PLD1    |
| ENSG00000116667 | 1095.47  | 1.288  | 4.75E-10 | 7.07E-06 | C1orf21 |
| ENSG00000069020 | 472.52   | 1.815  | 5.22E-10 | 7.77E-06 | MAST4   |
| ENSG00000265190 | 67.08    | -3.033 | 5.42E-10 | 8.06E-06 | ANXA8   |
| ENSG00000144749 | 1351.71  | 1.532  | 5.45E-10 | 8.11E-06 | LRIG1   |
| ENSG00000167972 | 98.60    | 2.421  | 6.83E-10 | 1.02E-05 | ABCA3   |
| ENSG00000155629 | 369.65   | 1.652  | 6.87E-10 | 1.02E-05 | PIK3AP1 |
| ENSG00000178038 | 331.07   | 1.621  | 7.52E-10 | 1.12E-05 | ALS2CL  |
| ENSG00000118777 | 718.80   | -1.336 | 7.77E-10 | 1.16E-05 | ABCG2   |
| ENSG00000151012 | 3761.13  | 1.349  | 9.43E-10 | 1.40E-05 | SLC7A11 |
| ENSG00000148926 | 947.58   | 1.413  | 9.47E-10 | 1.41E-05 | ADM     |
| ENSG00000018236 | 251.48   | 1.723  | 1.06E-09 | 1.57E-05 | CNTN1   |
| ENSG00000136531 | 339.29   | -1.733 | 1.09E-09 | 1.62E-05 | SCN2A   |
| ENSG00000173801 | 148.34   | -2.032 | 1.19E-09 | 1.77E-05 | JUP     |
| ENSG00000130751 | 290.68   | 1.599  | 1.21E-09 | 1.80E-05 | NPAS1   |
| ENSG00000137809 | 91.85    | -2.547 | 1.34E-09 | 2.00E-05 | ITGA11  |
| ENSG00000168398 | 38.61    | -4.623 | 1.34E-09 | 2.00E-05 | BDKRB2  |
| ENSG00000205213 | 526.43   | -1.439 | 1.41E-09 | 2.09E-05 | LGR4    |
| ENSG00000085117 | 114.80   | -2.152 | 1.45E-09 | 2.15E-05 | CD82    |
| ENSG00000151490 | 964.67   | -1.567 | 1.45E-09 | 2.15E-05 | PTPRO   |
| ENSG00000254585 | 42.56    | 4.634  | 1.46E-09 | 2.17E-05 | MAGEL2  |
| ENSG00000137571 | 71.96    | 2.910  | 1.53E-09 | 2.27E-05 | SLCO5A1 |

|                 |          |        |          |          |            |
|-----------------|----------|--------|----------|----------|------------|
| ENSG00000197102 | 25978.21 | 1.953  | 1.53E-09 | 2.28E-05 | DYNC1H1    |
| ENSG00000099937 | 70.80    | -2.773 | 1.56E-09 | 2.32E-05 | SERPIND1   |
| ENSG00000177504 | 59.29    | -3.233 | 1.62E-09 | 2.41E-05 | VCX2       |
| ENSG00000171049 | 90.09    | -8.671 | 1.68E-09 | 2.50E-05 | FPR2       |
| ENSG00000170412 | 65.83    | -2.759 | 1.89E-09 | 2.80E-05 | GPRC5C     |
| ENSG00000182795 | 82.55    | 2.624  | 1.92E-09 | 2.85E-05 | C1orf116   |
| ENSG00000147041 | 396.91   | -1.460 | 2.00E-09 | 2.97E-05 | SYTL5      |
| ENSG00000136250 | 180.02   | 1.852  | 2.03E-09 | 3.01E-05 | AOAH       |
| ENSG00000160145 | 118.46   | -2.089 | 2.04E-09 | 3.04E-05 | KALRN      |
| ENSG00000171105 | 614.49   | 1.640  | 2.13E-09 | 3.17E-05 | INSR       |
| ENSG00000119121 | 108.90   | -2.201 | 2.19E-09 | 3.26E-05 | TRPM6      |
| ENSG00000165171 | 661.79   | 1.321  | 2.24E-09 | 3.33E-05 | METTL27    |
| ENSG00000185818 | 748.25   | 1.378  | 2.40E-09 | 3.57E-05 | NAT8L      |
| ENSG00000146592 | 91.86    | 2.405  | 2.53E-09 | 3.77E-05 | CREB5      |
| ENSG00000205777 | 109.36   | 2.246  | 2.88E-09 | 4.28E-05 | GAGE1      |
| ENSG00000163975 | 5347.92  | 1.211  | 2.94E-09 | 4.38E-05 | MELTF      |
| ENSG00000130052 | 527.97   | 1.389  | 3.07E-09 | 4.57E-05 | STARD8     |
| ENSG00000157617 | 54.25    | -3.023 | 3.14E-09 | 4.67E-05 | C2CD2      |
| ENSG00000185432 | 148.37   | -2.182 | 3.25E-09 | 4.83E-05 | METTL7A    |
| ENSG00000169122 | 44.88    | -3.396 | 3.39E-09 | 5.04E-05 | FAM110B    |
| ENSG00000211445 | 436.50   | -1.454 | 3.40E-09 | 5.06E-05 | GPX3       |
| ENSG00000154678 | 14129.63 | 1.159  | 3.46E-09 | 5.15E-05 | PDE1C      |
| ENSG00000125398 | 3169.90  | 1.643  | 3.49E-09 | 5.19E-05 | SOX9       |
| ENSG00000144619 | 92.23    | 2.568  | 3.51E-09 | 5.22E-05 | CNTN4      |
| ENSG00000120738 | 132.40   | 2.137  | 3.72E-09 | 5.53E-05 | EGR1       |
| ENSG00000147394 | 245.04   | 1.901  | 4.10E-09 | 6.09E-05 | ZNF185     |
| ENSG00000023445 | 613.25   | 1.339  | 4.15E-09 | 6.18E-05 | BIRC3      |
| ENSG00000164070 | 1157.16  | -1.206 | 4.21E-09 | 6.27E-05 | HSPA4L     |
| ENSG00000185567 | 2119.01  | 1.414  | 4.29E-09 | 6.37E-05 | AHNAK2     |
| ENSG00000124107 | 42.72    | -3.860 | 4.43E-09 | 6.58E-05 | SLPI       |
| ENSG00000154274 | 173.89   | -1.882 | 4.53E-09 | 6.74E-05 | C4orf19    |
| ENSG00000111696 | 5758.44  | 1.371  | 4.60E-09 | 6.84E-05 | NT5DC3     |
| ENSG00000259753 | 1059.36  | -1.338 | 5.14E-09 | 7.64E-05 | AC068234.1 |
| ENSG00000197565 | 122.95   | -2.043 | 5.26E-09 | 7.82E-05 | COL4A6     |
| ENSG00000080573 | 47.39    | -3.345 | 5.70E-09 | 8.48E-05 | COL5A3     |
| ENSG00000163132 | 2877.28  | -1.132 | 5.88E-09 | 8.74E-05 | MSX1       |
| ENSG00000150551 | 1115.97  | -1.225 | 6.07E-09 | 9.03E-05 | LYPD1      |
| ENSG00000052802 | 5336.54  | 1.370  | 6.40E-09 | 9.52E-05 | MSMO1      |
| ENSG00000134955 | 1003.95  | -1.238 | 6.44E-09 | 9.58E-05 | SLC37A2    |
| ENSG00000198795 | 85.65    | 2.417  | 6.55E-09 | 9.74E-05 | ZNF521     |
| ENSG00000156804 | 590.24   | 1.388  | 6.57E-09 | 9.77E-05 | FBXO32     |

|                 |          |        |          |          |          |
|-----------------|----------|--------|----------|----------|----------|
| ENSG00000144802 | 829.92   | 1.252  | 6.62E-09 | 9.84E-05 | NFKBIZ   |
| ENSG00000170381 | 243.71   | 1.614  | 7.00E-09 | 1.04E-04 | SEMA3E   |
| ENSG00000111490 | 77.75    | -2.484 | 7.13E-09 | 1.06E-04 | TBC1D30  |
| ENSG00000123384 | 3378.40  | 1.552  | 7.51E-09 | 1.12E-04 | LRP1     |
| ENSG00000185716 | 3430.15  | 1.127  | 8.09E-09 | 1.20E-04 | MOSMO    |
| ENSG00000205309 | 194.89   | 1.730  | 8.48E-09 | 1.26E-04 | NT5M     |
| ENSG00000101752 | 8759.79  | 1.084  | 8.49E-09 | 1.26E-04 | MIB1     |
| ENSG00000128165 | 165.99   | 1.804  | 8.55E-09 | 1.27E-04 | ADM2     |
| ENSG00000065361 | 188.90   | 1.753  | 8.89E-09 | 1.32E-04 | ERBB3    |
| ENSG00000143333 | 999.63   | 1.217  | 9.32E-09 | 1.39E-04 | RGS16    |
| ENSG00000155324 | 362.58   | 1.519  | 9.74E-09 | 1.45E-04 | GRAMD2B  |
| ENSG00000159403 | 121.14   | 2.051  | 9.92E-09 | 1.48E-04 | C1R      |
| ENSG00000130762 | 60.32    | -2.850 | 1.01E-08 | 1.50E-04 | ARHGEF16 |
| ENSG00000163421 | 52.30    | 3.193  | 1.03E-08 | 1.53E-04 | PROK2    |
| ENSG00000178922 | 2637.84  | 1.203  | 1.05E-08 | 1.56E-04 | HYI      |
| ENSG00000101695 | 450.64   | 1.374  | 1.08E-08 | 1.61E-04 | RNF125   |
| ENSG00000140015 | 56.68    | 3.071  | 1.10E-08 | 1.64E-04 | KCNH5    |
| ENSG00000181577 | 59.70    | 2.884  | 1.17E-08 | 1.75E-04 | C6orf223 |
| ENSG00000205403 | 231.72   | -2.249 | 1.17E-08 | 1.75E-04 | CFI      |
| ENSG00000112414 | 4052.55  | 1.141  | 1.24E-08 | 1.85E-04 | ADGRG6   |
| ENSG00000182168 | 38.88    | -3.791 | 1.30E-08 | 1.93E-04 | UNC5C    |
| ENSG00000143473 | 156.11   | 1.883  | 1.34E-08 | 2.00E-04 | KCNH1    |
| ENSG00000244694 | 300.84   | -1.498 | 1.43E-08 | 2.12E-04 | PTCHD4   |
| ENSG00000130881 | 257.54   | 1.656  | 1.46E-08 | 2.17E-04 | LRP3     |
| ENSG00000146966 | 2363.91  | 1.331  | 1.60E-08 | 2.38E-04 | DENND2A  |
| ENSG00000182272 | 755.66   | 1.227  | 1.60E-08 | 2.38E-04 | B4GALNT4 |
| ENSG00000186480 | 7870.44  | 1.262  | 1.63E-08 | 2.42E-04 | INSIG1   |
| ENSG00000122966 | 3251.18  | 1.578  | 1.65E-08 | 2.45E-04 | CIT      |
| ENSG00000166073 | 2825.51  | 1.206  | 1.72E-08 | 2.55E-04 | GPR176   |
| ENSG00000100292 | 924.69   | -1.191 | 1.75E-08 | 2.60E-04 | HMOX1    |
| ENSG00000167995 | 15140.37 | -1.133 | 1.83E-08 | 2.72E-04 | BEST1    |
| ENSG00000169169 | 134.36   | 2.307  | 1.84E-08 | 2.73E-04 | CPT1C    |
| ENSG00000129353 | 1106.11  | 1.305  | 1.88E-08 | 2.79E-04 | SLC44A2  |
| ENSG00000049323 | 609.93   | -1.252 | 1.93E-08 | 2.88E-04 | LTBP1    |
| ENSG00000169306 | 957.14   | 1.200  | 1.98E-08 | 2.94E-04 | IL1RAPL1 |
| ENSG00000186297 | 407.49   | 1.411  | 1.98E-08 | 2.94E-04 | GABRA5   |
| ENSG00000135114 | 362.91   | -1.529 | 2.00E-08 | 2.97E-04 | OASL     |
| ENSG00000153233 | 125.00   | 2.121  | 2.13E-08 | 3.17E-04 | PTPRR    |
| ENSG00000175344 | 130.75   | 1.906  | 2.16E-08 | 3.21E-04 | CHRNA7   |
| ENSG00000166396 | 3779.16  | 1.189  | 2.22E-08 | 3.31E-04 | SERPINB7 |
| ENSG00000065325 | 195.96   | -1.763 | 2.23E-08 | 3.32E-04 | GLP2R    |

|                 |          |        |          |          |            |
|-----------------|----------|--------|----------|----------|------------|
| ENSG00000162723 | 98.57    | 2.156  | 2.39E-08 | 3.55E-04 | SLAMF9     |
| ENSG00000124762 | 7222.69  | -1.159 | 2.39E-08 | 3.55E-04 | CDKN1A     |
| ENSG00000171608 | 1101.31  | 1.197  | 2.75E-08 | 4.09E-04 | PIK3CD     |
| ENSG00000143387 | 158.80   | -2.215 | 2.75E-08 | 4.09E-04 | CTSK       |
| ENSG00000127252 | 53.11    | 2.939  | 2.80E-08 | 4.17E-04 | HRASLS     |
| ENSG00000138669 | 154.73   | 1.777  | 3.00E-08 | 4.46E-04 | PRKG2      |
| ENSG00000107295 | 1723.39  | 1.192  | 3.12E-08 | 4.63E-04 | SH3GL2     |
| ENSG00000143603 | 83.70    | -2.402 | 3.21E-08 | 4.77E-04 | KCNN3      |
| ENSG00000107719 | 125.18   | 1.924  | 3.24E-08 | 4.82E-04 | PALD1      |
| ENSG00000152217 | 270.88   | -1.491 | 3.27E-08 | 4.86E-04 | SETBP1     |
| ENSG00000133067 | 61.22    | -2.832 | 3.45E-08 | 5.13E-04 | LGR6       |
| ENSG00000135472 | 101.14   | -2.142 | 3.45E-08 | 5.13E-04 | FAIM2      |
| ENSG00000185070 | 604.39   | -1.245 | 3.57E-08 | 5.31E-04 | FLRT2      |
| ENSG00000152223 | 2852.96  | 1.249  | 3.62E-08 | 5.38E-04 | EPG5       |
| ENSG00000072274 | 20115.41 | -1.226 | 3.84E-08 | 5.72E-04 | TFRC       |
| ENSG00000081665 | 294.41   | 1.457  | 4.21E-08 | 6.26E-04 | ZNF506     |
| ENSG00000205269 | 353.87   | 1.400  | 4.27E-08 | 6.36E-04 | TMEM170B   |
| ENSG00000165272 | 104.86   | -2.083 | 4.37E-08 | 6.51E-04 | AQP3       |
| ENSG00000101255 | 11658.26 | 1.031  | 4.51E-08 | 6.71E-04 | TRIB3      |
| ENSG00000110987 | 324.76   | 1.397  | 4.57E-08 | 6.79E-04 | BCL7A      |
| ENSG00000158859 | 79.67    | -2.364 | 4.64E-08 | 6.91E-04 | ADAMTS4    |
| ENSG00000124942 | 39836.39 | 1.747  | 4.83E-08 | 7.18E-04 | AHNAK      |
| ENSG00000111266 | 906.46   | 1.156  | 4.90E-08 | 7.29E-04 | DUSP16     |
| ENSG00000185022 | 1263.00  | 1.152  | 2.17E-07 | 3.23E-03 | MAFF       |
| ENSG00000046774 | 11698.97 | -1.128 | 5.09E-08 | 7.57E-04 | MAGEC2     |
| ENSG00000169554 | 458.54   | 1.324  | 5.13E-08 | 7.63E-04 | ZEB2       |
| ENSG00000221955 | 130.20   | -1.953 | 5.32E-08 | 7.92E-04 | SLC12A8    |
| ENSG00000065618 | 378.95   | -1.610 | 5.34E-08 | 7.95E-04 | COL17A1    |
| ENSG00000255690 | 47.42    | -2.894 | 6.09E-08 | 9.06E-04 | TRIL       |
| ENSG00000104369 | 803.76   | 1.172  | 6.42E-08 | 9.54E-04 | JPH1       |
| ENSG00000164741 | 7321.56  | 1.116  | 6.55E-08 | 9.75E-04 | DLC1       |
| ENSG00000171298 | 1424.72  | 1.492  | 6.58E-08 | 9.79E-04 | GAA        |
| ENSG00000265118 | 182.87   | 1.623  | 6.59E-08 | 9.80E-04 | AC134669.1 |
| ENSG00000143494 | 158.31   | 1.743  | 6.63E-08 | 9.86E-04 | VASH2      |
| ENSG00000136161 | 189.19   | -1.648 | 6.75E-08 | 1.00E-03 | RCBTB2     |
| ENSG00000170537 | 716.05   | 1.177  | 6.79E-08 | 1.01E-03 | TMC7       |
| ENSG00000130508 | 952.52   | 1.217  | 8.34E-08 | 1.24E-03 | PXDN       |
| ENSG00000106003 | 405.04   | -1.345 | 8.69E-08 | 1.29E-03 | LFNG       |
| ENSG00000168994 | 1478.95  | 1.148  | 8.70E-08 | 1.29E-03 | PXDC1      |
| ENSG00000130433 | 99.13    | 2.041  | 8.83E-08 | 1.31E-03 | CACNG6     |
| ENSG00000079931 | 284.01   | 1.425  | 8.93E-08 | 1.33E-03 | MOXD1      |

|                 |          |        |          |          |           |
|-----------------|----------|--------|----------|----------|-----------|
| ENSG00000137501 | 1597.37  | 1.094  | 9.07E-08 | 1.35E-03 | SYTL2     |
| ENSG00000105767 | 952.39   | 1.125  | 9.12E-08 | 1.36E-03 | CADM4     |
| ENSG00000142173 | 8578.53  | 1.196  | 9.50E-08 | 1.41E-03 | COL6A2    |
| ENSG00000103811 | 540.50   | 1.344  | 9.54E-08 | 1.42E-03 | CTSH      |
| ENSG00000163686 | 592.83   | -1.221 | 9.91E-08 | 1.47E-03 | ABHD6     |
| ENSG00000148120 | 1263.95  | -1.118 | 1.02E-07 | 1.51E-03 | C9orf3    |
| ENSG00000145040 | 400.25   | -1.295 | 1.02E-07 | 1.52E-03 | UCN2      |
| ENSG00000155974 | 281.54   | -1.527 | 1.05E-07 | 1.57E-03 | GRIP1     |
| ENSG00000154813 | 2038.04  | -1.136 | 1.07E-07 | 1.59E-03 | DPH3      |
| ENSG00000143127 | 856.60   | 1.165  | 1.07E-07 | 1.59E-03 | ITGA10    |
| ENSG00000116584 | 14785.48 | 1.099  | 1.21E-06 | 1.79E-02 | ARHGEF2   |
| ENSG00000114126 | 1439.38  | 1.077  | 1.43E-07 | 2.12E-03 | TFDP2     |
| ENSG00000049759 | 7944.29  | 1.499  | 1.30E-07 | 1.94E-03 | NEDD4L    |
| ENSG00000136717 | 289.55   | -1.498 | 1.31E-07 | 1.95E-03 | BIN1      |
| ENSG00000196350 | 101.26   | 2.009  | 1.33E-07 | 1.98E-03 | ZNF729    |
| ENSG00000133639 | 3530.96  | 1.072  | 4.92E-08 | 7.32E-04 | BTG1      |
| ENSG00000031081 | 281.68   | -1.420 | 1.35E-07 | 2.00E-03 | ARHGAP31  |
| ENSG00000135048 | 2364.85  | -1.040 | 1.40E-07 | 2.08E-03 | CEMIP2    |
| ENSG00000119900 | 6114.42  | 1.005  | 1.34E-07 | 1.99E-03 | OGFRL1    |
| ENSG00000085662 | 11713.08 | -1.087 | 1.44E-07 | 2.14E-03 | AKR1B1    |
| ENSG00000172428 | 1219.74  | -1.169 | 1.46E-07 | 2.17E-03 | COPS9     |
| ENSG00000183780 | 834.08   | 1.276  | 1.53E-07 | 2.28E-03 | SLC35F3   |
| ENSG00000169129 | 42.97    | -3.148 | 1.59E-07 | 2.36E-03 | AFAP1L2   |
| ENSG00000124610 | 453.06   | -1.260 | 1.67E-07 | 2.48E-03 | HIST1H1A  |
| ENSG00000100473 | 511.57   | 1.224  | 1.67E-07 | 2.48E-03 | COCH      |
| ENSG00000094631 | 1479.15  | 1.126  | 1.80E-07 | 2.68E-03 | HDAC6     |
| ENSG00000116717 | 2491.36  | 1.019  | 1.83E-07 | 2.72E-03 | GADD45A   |
| ENSG00000118503 | 1195.84  | -1.090 | 1.86E-07 | 2.76E-03 | TNFAIP3   |
| ENSG00000101084 | 5334.70  | -1.027 | 1.90E-07 | 2.82E-03 | RAB5IF    |
| ENSG00000131242 | 96.12    | 2.086  | 1.97E-07 | 2.93E-03 | RAB11FIP4 |
| ENSG00000115828 | 553.88   | -1.551 | 2.14E-07 | 3.19E-03 | QPCT      |
| ENSG00000169213 | 2555.67  | 1.325  | 2.17E-07 | 3.23E-03 | RAB3B     |
| ENSG00000076513 | 3050.29  | 1.033  | 2.17E-07 | 3.23E-03 | ANKRD13A  |
| ENSG00000163453 | 1643.95  | -1.392 | 1.15E-07 | 1.71E-03 | IGFBP7    |
| ENSG00000167996 | 26007.78 | -1.104 | 2.26E-07 | 3.36E-03 | FTH1      |
| ENSG00000172432 | 2028.97  | 1.035  | 2.29E-07 | 3.40E-03 | GTPBP2    |
| ENSG00000196586 | 1361.16  | 1.214  | 2.38E-07 | 3.54E-03 | MYO6      |
| ENSG00000239713 | 2675.81  | -1.223 | 2.42E-07 | 3.59E-03 | APOBEC3G  |
| ENSG00000179873 | 283.93   | 1.548  | 2.42E-07 | 3.60E-03 | NLRP11    |
| ENSG00000172828 | 139.77   | 1.701  | 2.45E-07 | 3.65E-03 | CES3      |
| ENSG00000144218 | 41.52    | 3.324  | 2.66E-07 | 3.96E-03 | AFF3      |

|                 |          |        |          |          |            |
|-----------------|----------|--------|----------|----------|------------|
| ENSG00000170006 | 3333.70  | 1.075  | 2.68E-07 | 3.99E-03 | TMEM154    |
| ENSG00000142552 | 111.17   | 1.879  | 2.77E-07 | 4.12E-03 | RCN3       |
| ENSG00000251537 | 1019.72  | -1.095 | 2.79E-07 | 4.15E-03 | AC005324.3 |
| ENSG00000181649 | 1026.85  | -1.089 | 2.90E-07 | 4.31E-03 | PHLDA2     |
| ENSG00000223802 | 802.95   | 1.259  | 2.95E-07 | 4.39E-03 | CERS1      |
| ENSG00000106624 | 2697.82  | 1.438  | 3.04E-07 | 4.52E-03 | AEBP1      |
| ENSG00000167601 | 46882.64 | 1.222  | 3.04E-07 | 4.53E-03 | AXL        |
| ENSG00000071991 | 30.86    | 4.355  | 3.06E-07 | 4.55E-03 | CDH19      |
| ENSG00000132182 | 1051.37  | 1.352  | 3.17E-07 | 4.71E-03 | NUP210     |
| ENSG00000116299 | 60.47    | -2.549 | 3.35E-07 | 4.98E-03 | KIAA1324   |
| ENSG00000168477 | 84.14    | -2.283 | 3.38E-07 | 5.03E-03 | TNXB       |
| ENSG00000185507 | 139.07   | -1.712 | 3.41E-07 | 5.07E-03 | IRF7       |
| ENSG00000165716 | 308.32   | 1.444  | 3.49E-07 | 5.19E-03 | FAM69B     |
| ENSG00000169252 | 663.21   | 1.174  | 3.78E-07 | 5.62E-03 | ADRB2      |
| ENSG00000188177 | 375.66   | 1.462  | 3.86E-07 | 5.75E-03 | ZC3H6      |
| ENSG00000182636 | 1664.85  | 1.015  | 3.87E-07 | 5.75E-03 | NDN        |
| ENSG00000087253 | 2118.26  | -1.011 | 3.89E-07 | 5.78E-03 | LPCAT2     |
| ENSG00000100031 | 63.29    | -2.277 | 3.94E-07 | 5.86E-03 | GGT1       |
| ENSG00000151067 | 64.87    | 2.406  | 4.06E-07 | 6.03E-03 | CACNA1C    |
| ENSG00000100814 | 2168.72  | 1.179  | 4.11E-07 | 6.12E-03 | CCNB1IP1   |
| ENSG00000165821 | 75.61    | 2.143  | 4.16E-07 | 6.18E-03 | SALL2      |
| ENSG00000260170 | 554.40   | 1.236  | 4.19E-07 | 6.23E-03 | AC090527.2 |
| ENSG00000180287 | 29.52    | 4.307  | 4.19E-07 | 6.23E-03 | PLD5       |
| ENSG00000104856 | 1009.72  | 1.101  | 4.41E-07 | 6.56E-03 | RELB       |
| ENSG00000147676 | 592.33   | 1.219  | 4.47E-07 | 6.65E-03 | MAL2       |
| ENSG00000069431 | 144.23   | 1.679  | 4.61E-07 | 6.86E-03 | ABCC9      |
| ENSG00000149150 | 1134.37  | 1.039  | 4.62E-07 | 6.87E-03 | SLC43A1    |
| ENSG00000143816 | 109.92   | -2.217 | 4.91E-07 | 7.31E-03 | WNT9A      |
| ENSG00000091972 | 47.57    | 7.397  | 5.06E-07 | 7.53E-03 | CD200      |
| ENSG00000157303 | 77.27    | 2.113  | 5.19E-07 | 7.72E-03 | SUSD3      |
| ENSG00000103942 | 847.82   | 1.138  | 5.19E-07 | 7.72E-03 | HOMER2     |
| ENSG00000145536 | 115.24   | -1.778 | 5.33E-07 | 7.92E-03 | ADAMTS16   |
| ENSG00000140450 | 217.35   | 1.467  | 5.34E-07 | 7.95E-03 | ARRDC4     |
| ENSG00000002587 | 355.85   | 1.282  | 5.46E-07 | 8.11E-03 | HS3ST1     |
| ENSG00000091622 | 370.52   | 1.471  | 5.48E-07 | 8.15E-03 | PITPNM3    |
| ENSG00000188277 | 228.27   | -1.589 | 5.52E-07 | 8.21E-03 | C15orf62   |
| ENSG00000132963 | 7802.92  | -1.052 | 5.62E-07 | 8.36E-03 | POMP       |
| ENSG00000085871 | 353.96   | -1.263 | 5.80E-07 | 8.63E-03 | MGST2      |
| ENSG00000141682 | 6700.78  | 1.225  | 5.91E-07 | 8.80E-03 | PMAIP1     |
| ENSG00000074771 | 31.46    | 5.809  | 5.98E-07 | 8.89E-03 | NOX3       |
| ENSG00000113739 | 1526.50  | 1.050  | 6.00E-07 | 8.93E-03 | STC2       |



|                 |          |        |          |          |             |
|-----------------|----------|--------|----------|----------|-------------|
| ENSG00000069667 | 350.41   | 1.306  | 6.02E-07 | 8.95E-03 | RORA        |
| ENSG00000133863 | 210.26   | 1.513  | 6.14E-07 | 9.14E-03 | TEX15       |
| ENSG00000149489 | 359.15   | -1.228 | 6.52E-07 | 9.70E-03 | ROM1        |
| ENSG00000198211 | 10582.54 | -1.051 | 6.55E-07 | 9.74E-03 | AC092143.1  |
| ENSG00000148803 | 409.12   | 1.504  | 6.57E-07 | 9.77E-03 | FUOM        |
| ENSG00000176406 | 97.37    | 1.944  | 6.86E-07 | 1.02E-02 | RIMS2       |
| ENSG00000150782 | 902.57   | 1.154  | 6.92E-07 | 1.03E-02 | IL18        |
| ENSG00000064201 | 40.09    | -2.929 | 7.21E-07 | 1.07E-02 | TSPAN32     |
| ENSG00000258947 | 10787.04 | -1.052 | 7.61E-07 | 1.13E-02 | TUBB3       |
| ENSG00000198198 | 4207.92  | 1.092  | 7.64E-07 | 1.14E-02 | SZT2        |
| ENSG00000136114 | 120.11   | 1.763  | 7.65E-07 | 1.14E-02 | THSD1       |
| ENSG00000197019 | 603.17   | -1.110 | 7.98E-07 | 1.19E-02 | SERTAD1     |
| ENSG00000003147 | 466.26   | 1.310  | 8.06E-07 | 1.20E-02 | ICA1        |
| ENSG00000198574 | 164.54   | -1.508 | 8.06E-07 | 1.20E-02 | SH2D1B      |
| ENSG00000160867 | 285.57   | 1.286  | 8.62E-07 | 1.28E-02 | FGFR4       |
| ENSG00000133315 | 1313.37  | 1.018  | 8.63E-07 | 1.28E-02 | MACROD1     |
| ENSG00000152270 | 348.93   | 1.385  | 8.75E-07 | 1.30E-02 | PDE3B       |
| ENSG00000158321 | 151.53   | 1.599  | 8.76E-07 | 1.30E-02 | AUTS2       |
| ENSG00000182583 | 34.42    | -3.375 | 8.77E-07 | 1.31E-02 | VCX         |
| ENSG00000021645 | 40.54    | 3.182  | 9.13E-07 | 1.36E-02 | NRXN3       |
| ENSG00000140600 | 94.28    | 1.989  | 9.18E-07 | 1.37E-02 | SH3GL3      |
| ENSG00000148408 | 30.50    | 5.769  | 9.37E-07 | 1.39E-02 | CACNA1B     |
| ENSG00000111799 | 1596.66  | 1.465  | 9.62E-07 | 1.43E-02 | COL12A1     |
| ENSG00000151748 | 2095.57  | 1.008  | 1.02E-06 | 1.52E-02 | SAV1        |
| ENSG00000137880 | 868.05   | -1.334 | 1.08E-06 | 1.60E-02 | GCHFR       |
| ENSG00000189184 | 76.46    | -2.031 | 1.12E-06 | 1.66E-02 | PCDH18      |
| ENSG00000180354 | 433.88   | 1.172  | 1.12E-06 | 1.67E-02 | MTURN       |
| ENSG00000137440 | 459.03   | 1.212  | 1.12E-06 | 1.67E-02 | FGFBP1      |
| ENSG00000198021 | 173.04   | -1.717 | 1.14E-06 | 1.69E-02 | SPANXA1     |
| ENSG00000178980 | 1767.73  | -1.030 | 1.16E-06 | 1.72E-02 | SELENOW     |
| ENSG00000130956 | 1126.47  | 1.010  | 1.16E-06 | 1.73E-02 | HABP4       |
| ENSG00000006459 | 694.70   | 1.125  | 1.19E-06 | 1.77E-02 | KDM7A       |
| ENSG00000120708 | 24517.44 | -1.743 | 7.90E-19 | 1.17E-14 | TGFBI       |
| ENSG00000148346 | 38.95    | 2.972  | 1.21E-06 | 1.80E-02 | LCN2        |
| ENSG00000111424 | 593.66   | -1.315 | 1.25E-06 | 1.85E-02 | VDR         |
| ENSG00000120693 | 82.28    | 2.071  | 1.28E-06 | 1.90E-02 | SMAD9       |
| ENSG00000091136 | 38217.09 | 1.012  | 1.30E-06 | 1.93E-02 | LAMB1       |
| ENSG00000255152 | 768.57   | 1.048  | 1.30E-06 | 1.93E-02 | MSH5-SAPCD1 |
| ENSG00000101082 | 576.50   | -1.124 | 1.30E-06 | 1.94E-02 | SLA2        |
| ENSG00000101017 | 175.08   | 1.543  | 1.37E-06 | 2.04E-02 | CD40        |
| ENSG00000149633 | 266.28   | 1.319  | 1.38E-06 | 2.05E-02 | KIAA1755    |

|                 |          |        |          |          |           |
|-----------------|----------|--------|----------|----------|-----------|
| ENSG00000125730 | 785.30   | -1.118 | 1.41E-06 | 2.10E-02 | C3        |
| ENSG00000168811 | 272.99   | 1.276  | 1.43E-06 | 2.13E-02 | IL12A     |
| ENSG00000157111 | 186.86   | 1.446  | 1.44E-06 | 2.14E-02 | TMEM171   |
| ENSG00000104490 | 24.36    | -4.734 | 1.51E-06 | 2.24E-02 | NCALD     |
| ENSG00000146555 | 347.02   | 1.338  | 1.57E-06 | 2.34E-02 | SDK1      |
| ENSG00000171992 | 460.25   | -1.633 | 1.62E-06 | 2.40E-02 | SYNPO     |
| ENSG00000154134 | 673.18   | 1.063  | 1.62E-06 | 2.41E-02 | ROBO3     |
| ENSG00000133121 | 1089.11  | 1.080  | 1.70E-06 | 2.53E-02 | STARD13   |
| ENSG00000184678 | 15817.52 | 1.057  | 1.72E-06 | 2.56E-02 | HIST2H2BE |
| ENSG00000183117 | 140.06   | 1.560  | 1.72E-06 | 2.56E-02 | CSMD1     |
| ENSG00000139567 | 46.21    | 2.661  | 1.73E-06 | 2.57E-02 | ACVRL1    |
| ENSG00000168079 | 62.45    | -2.186 | 1.73E-06 | 2.58E-02 | SCARA5    |
| ENSG00000141639 | 37.10    | -3.006 | 1.77E-06 | 2.64E-02 | MAPK4     |
| ENSG00000124406 | 711.26   | -1.180 | 1.79E-06 | 2.66E-02 | ATP8A1    |
| ENSG00000110172 | 4613.17  | -1.047 | 1.82E-06 | 2.71E-02 | CHORDC1   |
| ENSG00000144199 | 289.78   | 1.369  | 1.87E-06 | 2.78E-02 | FAHD2B    |
| ENSG00000170175 | 733.90   | 1.095  | 1.89E-06 | 2.81E-02 | CHRNA1    |
| ENSG00000143344 | 1512.75  | -1.037 | 1.93E-06 | 2.87E-02 | RGL1      |
| ENSG00000163235 | 11108.18 | -1.934 | 3.59E-17 | 5.33E-13 | TGFA      |
| ENSG00000130304 | 947.72   | 1.022  | 2.01E-06 | 2.99E-02 | SLC27A1   |
| ENSG00000186575 | 13801.53 | 1.219  | 2.03E-06 | 3.02E-02 | NF2       |
| ENSG00000198963 | 190.84   | -1.405 | 2.03E-06 | 3.02E-02 | RORB      |
| ENSG00000126091 | 825.92   | 1.024  | 2.04E-06 | 3.04E-02 | ST3GAL3   |
| ENSG00000186868 | 85.15    | 2.016  | 2.07E-06 | 3.08E-02 | MAPT      |
| ENSG00000171097 | 707.42   | 1.035  | 2.08E-06 | 3.10E-02 | KYAT1     |
| ENSG00000115738 | 67.86    | -2.058 | 2.14E-06 | 3.19E-02 | ID2       |
| ENSG00000100767 | 407.81   | 1.144  | 2.20E-06 | 3.27E-02 | PAPLN     |
| ENSG00000145777 | 65.28    | 2.424  | 2.29E-06 | 3.41E-02 | TSLP      |
| ENSG00000139372 | 1264.67  | -1.108 | 2.30E-06 | 3.42E-02 | TDG       |
| ENSG00000127920 | 1927.47  | -1.135 | 2.32E-06 | 3.45E-02 | GNG11     |
| ENSG00000119866 | 121.95   | 1.740  | 2.32E-06 | 3.45E-02 | BCL11A    |
| ENSG00000171617 | 2424.57  | -1.035 | 2.39E-06 | 3.56E-02 | ENC1      |
| ENSG00000165071 | 40.27    | 2.794  | 2.44E-06 | 3.63E-02 | TMEM71    |
| ENSG00000151623 | 56.63    | 2.287  | 2.53E-06 | 3.77E-02 | NR3C2     |
| ENSG00000186104 | 186.60   | 1.413  | 2.56E-06 | 3.80E-02 | CYP2R1    |
| ENSG00000103196 | 55.29    | -2.690 | 2.56E-06 | 3.81E-02 | CRISPLD2  |
| ENSG00000197728 | 492.72   | -1.100 | 2.61E-06 | 3.88E-02 | RPS26     |
| ENSG00000130283 | 519.41   | 1.285  | 2.69E-06 | 4.00E-02 | GDF1      |
| ENSG00000166292 | 24.74    | -4.141 | 2.70E-06 | 4.02E-02 | TMEM100   |
| ENSG00000116661 | 225.90   | -1.295 | 2.78E-06 | 4.14E-02 | FBXO2     |
| ENSG00000169946 | 866.03   | 1.006  | 2.79E-06 | 4.16E-02 | ZFPM2     |

|                 |        |        |          |          |         |
|-----------------|--------|--------|----------|----------|---------|
| ENSG00000183018 | 374.14 | 1.486  | 2.80E-06 | 4.17E-02 | SPNS2   |
| ENSG00000149260 | 324.86 | -1.263 | 2.84E-06 | 4.22E-02 | CAPN5   |
| ENSG00000136859 | 610.66 | -1.042 | 2.85E-06 | 4.23E-02 | ANGPTL2 |
| ENSG00000163545 | 708.78 | 1.497  | 2.85E-06 | 4.24E-02 | NUAK2   |
| ENSG00000132357 | 321.80 | -1.182 | 3.18E-06 | 4.73E-02 | CARD6   |
| ENSG00000189410 | 655.50 | 1.081  | 3.23E-06 | 4.80E-02 | SH2D5   |

Table S2: qPCR primer sequences

| Gene   | Entrez-ID      | forward                   | reverse                  |
|--------|----------------|---------------------------|--------------------------|
| NGFR   | NM_002507.4    | ACCTCCAGAACAAGACCTCATAGC  | TTGTTCTGCTTGCAGCTGTTCC   |
| MET    | NM_001127500.3 | TGAAGTGGATGGCTTTGG        | GCAGTATTCGGGTTGTAGG      |
| ABCB5  | NM_001163941.2 | CTCACCCCTAGTGACTCTATCC    | CCTAAAGGCTATGACTGTTCCG   |
| CD274  | NM_014143.4    | CACCAATTCCAAGAGAGAGG      | AGGTAGTTCTGGGATGACC      |
| ATF3   | NM_001674.4    | TGTGAATGCTGAACTGAAGG      | GAGGTTTCTCTCATCTTCTGG    |
| TMEM47 | NM_031442      | GTACTACCTGTCGTTGTGG       | CACGCAGATAGAAATCAAACC    |
| SOX9   | NM_000346      | TTCATGAAGATGACCGACGAGCAGG | TCCTCGCTCTCCTTCTTCAGATCG |
| ACTB   | NM_001101.5    | GCCATGTACGTTGCTATCC       | TCATGAGGTAGTCAGTCAGG     |
